# Supplementary material
Source: Springer Nature journal article supplement (https://www.springermedizin.de/resource/supplementary/12885_2012_3644_MOESM5_ESM.pdf/9465038)

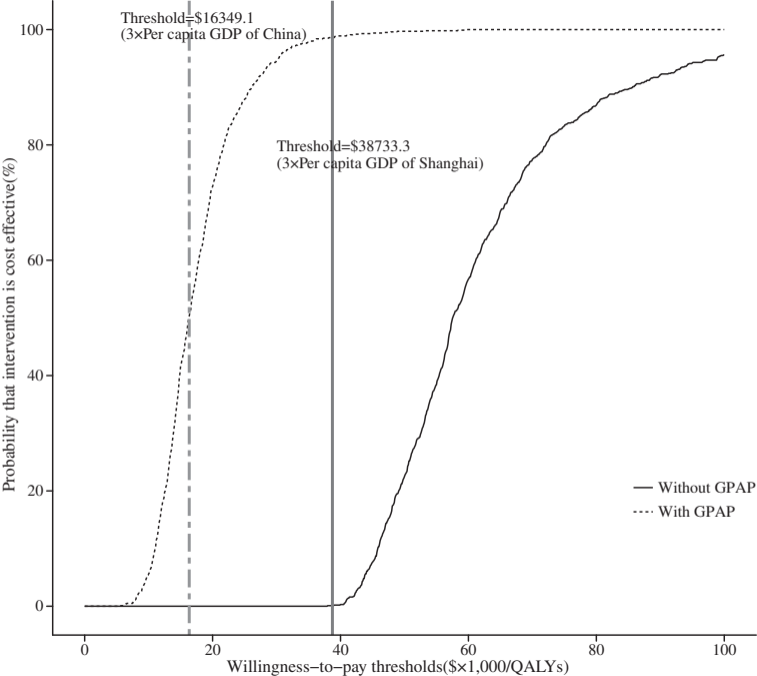

Supplement: MOESM5 [file 9465038]
